# Supplementary material for: In Vitro Characterization of Guanylyl Cyclase BdPepR2 from Brachypodium distachyon Identified through a Motif-Based Approach
Source: MDPI journal article supplement (doi:10.3390/ijms22126243), 2021-06-10
Supplement: s1 [file s1]

|              |                                                                |      |
|--------------|----------------------------------------------------------------|------|
| Brachypodium | NVGLILYEYMPEGTLFELLHERKPKQVALGWMARHQIALGVAQGLSYLHQDCVPMIVHRDV  | 992  |
| Hordeum      | GAGLILYEYMPEGTLFELLHGRRPQVALGWTARHQIALGLAQGLSYLHQDCVPMIVHRDV   | 1060 |
| Triticum     | GAGLILYEYMPEGTLFELLHGRKPQVALGWTVRHQIALGLAEGLSYLHQDCVPMIVHRDV   | 993  |
| Oryza        | SVGLILYEYMPEGTLFELLHRRKPHAALDWTVRHQIAFGVAQGLSYLHHDVCVPMIVHRDV  | 976  |
| Panicum      | SIGLILCEYMPEGTLFDLFHQKPKQVALDWMTRHQIALGIAQGLSYLHHDVCVPMIVHRDV  | 966  |
| Setaria      | SVGLILCEYMPKGTFLFDLLHQKPKQVALDWMIRHQIALGVAQGLSYLHHDVCVPMIVHRDV | 1001 |
|              | . **** :****:***:*** **::**.* *****:***:*****:*****            |      |
| Brachypodium | KSSNILMDVELVPKLTDFGMGKIVGDESDATVSVIVGTLGYIAPEHGYSTRLSEKSDVY    | 1052 |
| Hordeum      | KSNVNLMDADMVPKLADFGMGKIVGDESDATVSVIVGTLGYIAPEHGYSTRLTEKSDVY    | 1120 |
| Triticum     | KSSNVNLMDADMVPKLADFGMGKIVGDESDATVSVIVGTLGYIAPEHGYSTRLTEKSDVY   | 1053 |
| Oryza        | KSSNILMDTELVPKLTDFGMGKIVEDDDLDATVSVVVGTLGYIAPEHGYSTRLTEKSDVY   | 1036 |
| Panicum      | KSSNILMDSELVPKLTDFGMGKIVHDESDATVSVIVGTLGYIAPEHGYSTRLTEKSDVY    | 1026 |
| Setaria      | KSSNILMDTELVPKLTDFGMGKIVHDESDATVSAVIGTLGYIAPEHGYSTRLTEKSDVY    | 1061 |
|              | **.*:*** :****:***** **.* :****.:*****:***** ***:*****         |      |
| Brachypodium | SYGVVLELLCRKMPVDSAFGDGVDIVTWMRSNLKQADHC-SVMSCLDEEIVYWPEDQA     | 1111 |
| Hordeum      | SYGVVLELLCRKMAVDPAFGDGDIVTWMRSNPKQADRRPAAMSCLEEIVYWPEDQA       | 1180 |
| Triticum     | SYGVVLELLCRKMAVDPAFGDGDIVTWMRSNLKQADRRPAAMSCLEEIVYWPEDQA       | 1113 |
| Oryza        | SYGVVLELLCRKMPVDPAFGDSVDIVTWMRSNLTQADRR-VIMECLDEEIMYWPEDQA     | 1095 |
| Panicum      | SYGVVLELLCRKMPVDPSFGDGDIVATWMRTKLKQADHS-SIISLMDEEIMYWPEDQE     | 1085 |
| Setaria      | SYGVVLELLCRKMPVDPSFEDGVDIVATWIRTKLKQADRC-SIIDLMDEEIMYWPEDDQE   | 1120 |
|              | ***** ** :* *.***.**::.***: :. :****:*****:*                   |      |
| Brachypodium | KALHLLDLAISCTEVACQLRPSMREVNVNLRMDK----                         | 1146 |
| Hordeum      | RALDMLDLAISCTQFSFQSRPSMREVNTLLRMDM----                         | 1215 |
| Triticum     | KALDLLDLAISCTQAACQSRPSMREVNTLVRMDMQGFP                         | 1152 |
| Oryza        | KALDLLDLAMYCTQLACQSRPSMREVNNLMRMDK----                         | 1130 |
| Panicum      | KALDLLDLAVSCSQVACQSRPSMREVNNMLMKIEK----                        | 1120 |
| Setaria      | KALDLLDLAVSCTQVACQSRPSMREVNNMLLKIEK----                        | 1155 |
|              | :**.:****: **:: * ***** *:***                                  |      |

Figure S1. Alignment of the BdPepR2 aa sequence with other predicted leucine-rich repeat receptor-like protein kinase PEPR1/2 proteins from the *Poaceae* family.
