# Supplementary material for: In Vitro Characterization of Guanylyl Cyclase BdPepR2 from Brachypodium distachyon Identified through a Motif-Based Approach
Source: MDPI journal article supplement (doi:10.3390/ijms22126243), 2021-06-10
Supplement: s1 [file s1]

**Table S1 SPECIFIC PRIMERS SEQUENCES**

**Sequence of the primers employed for PCR amplification in this study.** The table includes oligonucleotide sequences employed for cloning (lower case letters indicate the *SalI* and *NotI* restriction sites, respectively) and site-directed mutagenesis

| Primer nomenclature                           | 5'-3' oligonucleotide sequence              |
|-----------------------------------------------|---------------------------------------------|
| <i>BdPepR2</i> (for cloning)                  |                                             |
| BdPepR2 forward                               | GAATTCCCGGgtcgacAATGCCTGGGCGCCTATCG         |
| BdPepR2 reverse                               | AGTCACGATgcgggccgcTTACTTGTCCATTCTCACCAAGACA |
| <i>BdTTM3</i> (for site-directed mutagenesis) |                                             |
| BdPepR2 M1066A forward                        | TGCAGAATCCACAGGCGCCTTCCTGCACAGGAGC          |
| BdPepR2 M1066A reverse                        | GCTCCTGTGCAGGAAGGCGCCTGTGGATTCTGCA          |
| BdPepR2 M1066R forward                        | ATCCACAGGCCTCTTCCTGCACAGGAGCTC              |
| BdPepR2 M1066R reverse                        | GAGCTCCTGTGCAGGAAGAGGCCTGTGGAT              |
